1  
2  
3  
4  
5  
6  
7  
8  
9  
10  
11  
12  
13  
14  
15  
16  
17  
18  
19

**Integrated computational and *Drosophila* cancer model platform captures previously unappreciated chemicals perturbing a kinase network**

Peter Man-Un Ung<sup>1†</sup>, Masahiro Sonoshita<sup>2†</sup>, Alex P. Scopton<sup>3</sup>, Arvin C. Dar<sup>3</sup>, Ross L. Cagan<sup>2\*</sup>, Avner Schlessinger<sup>1\*</sup>

<sup>1</sup>*Department of Pharmacological Sciences, Icahn School of Medicine at Mount Sinai, New York, NY, 10029.*

<sup>2</sup>*Department of Cell, Developmental and Regenerative Biology, Icahn School of Medicine at Mount Sinai, New York, NY 10029.*

<sup>3</sup>*Department of Oncological Sciences, Icahn School of Medicine at Mount Sinai, New York, NY 10029.*

\* Corresponding authors. E-mail:

[ross.cagan@mssm.edu](mailto:ross.cagan@mssm.edu)

[avner.schlessinger@mssm.edu](mailto:avner.schlessinger@mssm.edu)

† These authors contributed equally to this work.

20 **ABSTRACT**

21 *Drosophila* provides an inexpensive and quantitative platform for measuring whole animal  
22 drug response. A complementary approach is virtual screening, where chemical libraries  
23 can be efficiently screened against protein target(s). Here, we present a unique discovery  
24 platform integrating structure-based modeling with *Drosophila* biology and organic syn-  
25 thesis. We demonstrate this platform by developing chemicals targeting a *Drosophila*  
26 model of Medullary Thyroid Cancer (MTC) with disease-promoting kinase network acti-  
27 vated by mutant dRet<sup>M955T</sup>. Structural models for kinases relevant to MTC were generated  
28 for virtually screening to identify initial hits that were dissimilar to known kinase inhibitors  
29 yet suppressed dRet<sup>M955T</sup>-induced oncogenicity. We then combined features from the hits  
30 and known inhibitors to create a ‘hybrid’ molecule with improved dRet<sup>M955T</sup> phenotypic  
31 outcome. Our platform provides a framework to efficiently explore novel chemical spaces,  
32 develop compounds outside of the current inhibitor chemical space, and “correct” cancer-  
33 causing signaling networks to improve disease prognosis while minimizing whole body  
34 toxicity.

35

36 **AUTHOR SUMMARY**

37           Effective and safe treatment of multigenic diseases often involves drugs that mod-  
38 ulate whole systems by interacting with multiple nodes in pathways and networks, i.e.,  
39 polypharmacology. Polypharmacology is increasingly appreciated as a potential desirable  
40 property of kinase drugs; however, most known drugs that interact with multiple targets  
41 have been identified as such by chance, and most polypharmacological compounds are  
42 not chemically unique resembling to structures of known kinase inhibitors. The fruit fly  
43 *Drosophila* has been established as a robust screening platform that provides an inex-  
44 pensive, rapid, and quantitative measure of whole animal drug response, complementing  
45 computational approaches. We present a chemical genetics approach that efficiently  
46 combines *Drosophila* with structural prediction and virtual screening, creating a unique  
47 discovery platform. We demonstrate the utility of our approach by developing useful small  
48 molecules targeting a kinase network in a *Drosophila* model of Medullary Thyroid Cancer  
49 (MTC) driven by the active mutant dRet<sup>M955T</sup>.

50

## 51 INTRODUCTION

52 Protein kinases play a key role in cell signaling and disease networks and make  
53 up major therapeutic targets. The limited capacity to test large number of compounds  
54 exploring diverse chemical scaffolds, coupled with the low translatability of *in vitro* kinase  
55 inhibition into whole animal efficacy, effectively constrain the chemical space of the known  
56 kinase inhibitors (KIs). Thus, obtaining optimal KIs at clinically relevant therapeutic levels  
57 is challenging, despite extensive academic and industry effort.

58 To expand the number of kinase inhibitors, a variety of platforms have recently  
59 emerged as useful tools for compound screening. *Drosophila melanogaster* (fruit fly) pro-  
60 vides an inexpensive and efficient biological platform for cancer drug screening, capturing  
61 clinically relevant compounds [1-3]. For example, *Drosophila* was used to help validate  
62 vandetanib as a useful treatment for medullary thyroid cancer [4] (MTC). As a screening  
63 platform, *Drosophila* offers several advantages: First, flies and humans share similar ki-  
64 nome and kinase-driven signaling pathways [5], facilitating the use of flies to predict drug  
65 response in humans [1, 6]. Second, the ease of breeding and the short (~10 day) life cycle  
66 of *Drosophila* make it possible to carry out efficient mid-throughput chemical screening in  
67 a biological system. Third, the screening readout provides a quantitative animal-based  
68 measurement of structure-activity relationships (SAR), and further provides information  
69 on the therapeutic potential or toxicity of the tested compounds: measurable parameters  
70 include survival and multiple phenotypic indicators that depend on kinase activity.

71 One key limitation of *Drosophila*-based mid-throughput screening platform is that  
72 it cannot explore very large chemical libraries [7], such as the ZINC library which has over  
73 750 million purchasable compounds [8]. In contrast, structure-based virtual screening is

74 a fast and inexpensive computational method that can screen large compound libraries,  
75 a useful approach to identify unique chemical probes [9]. If the structure of the protein is  
76 unknown, virtual screening can be performed against the homology models of the target  
77 constructed based on experimentally determined structures. However, the automated  
78 construction of homology models—with sufficient accuracy for virtual screening for multi-  
79 ple targets simultaneously and the application of molecular docking to signaling net-  
80 works—remains challenging in particular for highly dynamic targets such as kinases [10,  
81 11] and would benefit from a readily accessible whole animal platform.

82 RET is a receptor tyrosine kinase associated with multiple roles in development  
83 and homeostasis. Activation of RET by the mutation M918T (analogous to *Drosophila*  
84 M955T) is associated with MTC [12, 13]. Transgenic *Drosophila* expressing the dRet<sup>M955T</sup>  
85 isoform show key aspects of transformation, including proliferation and some aspects of  
86 metastasis [6, 14]. Genetic modifier screens with dRet<sup>M955T</sup> flies led to the identification of  
87 multiple RET pathway genetic ‘suppressors’ and ‘enhancers’, loci that when reduced in  
88 activity improve or worsen the disease phenotype, respectively. These functional media-  
89 tors of RET-dependent transformation include members of the Ras/ERK and PI3K path-  
90 ways as well as regulators of metastasis such as SRC [6, 15].

91 Oral administration of the FDA approved, structurally related multi-kinase inhibitor  
92 analogs sorafenib and regorafenib, along with additional structural analogs, partially res-  
93 cued dRet<sup>M955T</sup>-induced oncogenicity in *Drosophila* [1, 15]. Sorafenib class inhibitors are  
94 classified as ‘type-II’ KIs that bind the kinase domain in its inactive state [16], a confor-  
95 mational state regulated by the aspartate-phenylalanine-glycine (DFG)-motif (Fig. 1A)  
96 [17, 18]. In the inactive, ‘DFG-out’ conformational state the directions of DFG-Asp and

97 DFG-Phe ‘flip’, vacating a pocket previously occupied by DFG-Phe (‘DFG-pocket’) that  
98 modulates binding to type-II inhibitors. A key challenge of targeting kinases in the DFG-  
99 out conformation with structure-based virtual screening is that few kinase structures have  
100 been reported with the DFG-out conformation [19]. We have recently developed DFG-  
101 model [10], a computational method for modeling kinases in DFG-out conformations. This  
102 method informed the mechanism of clinically relevant multi-kinase inhibitors that target  
103 the MTC network [15].

104 In this study, we report the development of an integrated platform (Fig. 2) that  
105 combines (i) computational modeling of kinases in their inactive state plus massive multi-  
106 target virtual screenings with (ii) whole animal *Drosophila* assays to discover previously  
107 unappreciated chemicals that perturb the RET-dependent transformation. Furthermore,  
108 we leverage these insights to create a novel ‘hybrid’ molecule with unique chemical struc-  
109 ture and biological efficacy. Finally, we discuss the relevance of this approach to expedite  
110 the discovery of novel chemical scaffolds targeting disease networks.

111

## 112 RESULTS

113 **Target selection from fly genetic screen and structural analysis.** In transgenic  
114 *patched-GAL4;UAS-dRet<sup>M955T</sup>* (*ptc>dRet<sup>M955T</sup>*) flies, the *ptc* promoter drives expression  
115 of an oncogenic isoform of *Drosophila* Ret in multiple tissues; the result is lethality prior  
116 to adult eclosion [1, 15]. We previously used this and similar fly MTC models in genetic  
117 screens to identify 104 kinases that mediate *dRet<sup>M955T</sup>*-mediated transformation [15]  
118 (Figs. 1B, 2A, S1).

119 To narrow this list, we prioritized candidates based on two considerations: (i) phar-  
120 macological relevance – kinases downstream of RET signaling were prioritized due to  
121 their established functional role [6, 20]; (ii) structural coverage – kinases with known DFG-  
122 out structures or those that can be modeled with sufficient accuracy in this conformation  
123 were further investigated [10]. Atypical kinases (*e.g.*, mTOR and eEF2K) and members  
124 of the RGC family were excluded as they have diverse sequence and structure features  
125 that limit our ability to generate accurate homology models. Applying these criteria to our  
126 genetic modifier list, we focused on targeting four key kinase targets: RET (receptor tyro-  
127 sine kinase), SRC (tyrosine kinase), BRAF (tyrosine kinase-like), and p70-S6K (AGC fam-  
128 ily).

129 **Modeling kinases in DFG-out conformation.** Description of the various conformations  
130 adopted by the kinases during activation and inhibition is needed for rationally designing  
131 novel, conformation-specific inhibitors. Therefore, our approach was to perform massive  
132 structure-based virtual screenings of purchasable compound libraries against multiple  
133 models with DFG-out conformation; our goal was to identify generic kinase inhibitors that

134 may target one or more prioritized kinases – but more importantly – have an effect on the  
135 disease pathway in the animal model.

136         The structure of two of the kinases identified in our *dRet*<sup>M955T</sup> model—BRAF and  
137 SRC—have been solved in the DFG-out conformation; the DFG-out structures of RET  
138 and p70-S6K have not been reported. We therefore generated DFG-out models using  
139 DFGmodel, a computational tool that generates homology models of kinase in DFG-out  
140 conformation through multiple-template modeling that samples a range of relevant con-  
141 formations [10]. These models enrich known type-II inhibitors among a diverse set of non-  
142 type-II KIs found in PDB with accuracy similar to or better than that obtained for experi-  
143 mentally determined structures and provides approximation for binding site flexibility [10].  
144 For example, in a recent application of DFGmodel, models generated by this method were  
145 used in parallel with medicinal chemistry to optimize clinically relevant compounds that  
146 are based on the established kinase inhibitor sorafenib [15]. Conversely, in this study,  
147 models generated by DFGmodel are used to develop compounds that are outside of the  
148 current kinase inhibitor chemical space.

149         To guide the identification of a “generic” kinase inhibitor of a disease pathway, we  
150 first compared the DFG-out models of the kinases, identifying key similarities and differ-  
151 ences in physicochemical properties among their inhibitor-binding sites. First, we noted  
152 that the prioritized targets RET, BRAF, p70-S6K, and SRC present negative electrostatic  
153 potential on the DFG-pocket surface, while many non-targets such as ERK have positive  
154 electrostatic potential (Fig. 3A). This difference may partially explain the partial selectivity  
155 of type-II inhibitors (e.g., sorafenib) toward our prioritized targets but not on electrostatic  
156 positive kinases such as ERK. Second, RET and SRC have large DFG-pocket volumes



157 (163 Å<sup>3</sup>, 196 Å<sup>3</sup>); p70-S6K and BRAF have moderately large pockets (158 Å<sup>3</sup>, 136 Å<sup>3</sup>). In  
158 contrast, ERK has a small DFG-pocket (113 Å<sup>3</sup>) (Fig. 3B). We used this size difference to  
159 computationally select for kinases with larger DFG-pockets (e.g., RET, SRC) while ex-  
160 cluding kinases with smaller DFG-pockets (e.g., ERK).

161 **Virtual screening against MTC pathway.** We performed virtual screening against mul-  
162 tiple DFG-out models of MTC targets to identify putative small molecules that modulate  
163 the disease network (Fig. 2C). We docked a purchasable lead-like library from the ZINC  
164 database [21] (2.2 millions compounds) against 10 DFG-out models for each kinase tar-  
165 get, yielding over 88 million total docking poses. To combine the screening results, a two-  
166 step consensus approach was used. In the first step, compounds that ranked in the top  
167 10% in 5 or more of the 10 models of each kinase were selected, resulting in approxi-  
168 mately 2,000 compounds per kinase. In the second step, compounds that ranked in the  
169 top 25% in at least 3 of 4 targets were selected, resulting in 247 compounds. For com-  
170 parison, sorafenib, an inhibitor that rescues *ptc>dRet*<sup>M955T</sup> flies, would rank eighth in this  
171 consensus docking result. From these consensus compounds, eight commercially avail-  
172 able compounds were purchased to test their ability to rescue *ptc>dRet*<sup>M955T</sup> flies (Table  
173 S1). These compounds were selected based on their interactions with key elements of  
174 the “ensemble” of targets’ binding sites, with the emphasis on the conserved glutamate  
175 in αC-helix, the amide backbone of DFG-aspartate, and if present, the amide backbone  
176 of the hinge region (Fig. S3). Although the compounds are not predicted to bind optimally  
177 to each one of our targets, we hypothesized that these compounds may have an additive  
178 effect on the disease pathway, which could be improved with medicinal chemistry.

179 **Testing candidates in *ptc>dRet*<sup>M955T</sup> fly viability assay.** Transgenic *ptc>dRet*<sup>M955T</sup> flies  
180 express the oncogenic *Drosophila* dRet<sup>M955T</sup> isoform in several tissues in the developing  
181 fly, leading to transformation of dRet<sup>M955T</sup> tissues [6, 14]. As a result, *ptc>dRet*<sup>M955T</sup> flies  
182 exhibited 0% adult viability when cultured at 25°C, providing a quantitative ‘rescue-from-  
183 lethality’ assay to test drug efficacy [1, 15]. Compounds were fed at the highest accessible  
184 concentrations (see Experimental Procedures). We used sorafenib as a positive control,  
185 as it previously demonstrated the highest level of rescue among FDA-approved KIs in  
186 *ptc>dRet*<sup>M955T</sup> flies [15]. Similar to our previous results, feeding *ptc>dRet*<sup>M955T</sup> larvae so-  
187 rafenib (200 µM) improved overall viability to 3-4% adult survival ( $P < 0.05$ ).

188 We used this rescue-from-lethality assay to test the efficacy of the eight com-  
189 pounds identified through virtual screening (Figs. 4B, 5B). When fed orally, two unique  
190 compounds, **1** and **2** (Table S2), rescued a small fraction of *ptc>dRet*<sup>M955T</sup> flies to adult-  
191 hood (Figs. 4A and 5A) and did not affect the body size of the larvae and pupae, a metrics  
192 for comparing food intake, of *ptc>dRet*<sup>M955T</sup> flies when compared to the wild-type. At the  
193 maximum final concentration in fly food (100 µM), **1** rescued 1% ( $P < 0.05$ ) *ptc>dRet*<sup>M955T</sup>  
194 flies to adulthood as compared to 3-4% rescue by sorafenib at 200 µM (Fig. 4A). **1** is  
195 characterized by the 3-phenyl-(1*H*)-1,2,4-triazole moiety (Fig. 4B). **2**, characterized by the  
196 1*H*-indole-2-carboxamide moiety, improved *ptc>dRet*<sup>M955T</sup> fly viability to an average of 1%  
197 ( $P < 0.05$ ) when tested at 25-400 µM (Fig. 5A, B).

198 **Confirmation of novel chemical scaffolds.** To validate the chemical scaffolds identified  
199 in our initial *Drosophila*-based chemical genetic screening, we conducted a ligand-based  
200 chemical similarity search in the updated ZINC [8] to identify analogs of **1** and **2**. For  
201 compound **1**, we retrieved five compounds that share the 3-phenyl-(1*H*)-1,2,4-triazole

202 feature and have docking poses similar to **1**. Our *ptc>dRet<sup>M955T</sup>* screen confirmed two  
203 active compounds, **1-1** and **1-2** (Table S2; Fig. 4A, 4B). **1-1** outperformed **1** slightly in  
204 *ptc>dRet<sup>M955T</sup>* fly rescue at similar concentrations (4%;  $P < 0.05$ ). Conversely, **1-2** was  
205 tested at higher concentrations (50 and 200  $\mu$ M) but did not result in better efficacy ( $P <$   
206 0.05).

207 The docking poses of **1-1** and **1-2** resemble the proposed docking pose of **1** (Fig.  
208 4B), which has a typical DFG-out-specific, type-II KI binding pose and is predicted to oc-  
209 cupy the DFG-pocket with the terminal phenyl moiety. The 1,2,4-triazole moiety, resem-  
210 bles the urea moiety found in sorafenib (Fig. 1A), forms favorable hydrogen bonds with  
211 the side chain of the conserved  $\alpha$ C-helix glutamate residue and the backbone amide of  
212 the DFG-Aspartate. In addition, this series of compounds are smaller and shorter (MW <  
213 360) than the fully developed type-II KIs (MW > 450) such as sorafenib, as they lack an  
214 optimized moiety that interacts with the hinge region of the ligand-binding site (Fig. 4C).

215 Compound **1-2** differs from **1** and **1-1** structurally and was less effective in rescuing  
216 *ptc>dRet<sup>M955T</sup>* flies, even though it was tested at higher concentrations (Fig. 4A). While **1**  
217 and **1-1** have an (1*H*)-1,2,4-triazole moiety, **1-2** has an 1,2,4-oxadiazol-5-amine moiety,  
218 where the (1*H*)-nitrogen is replaced by an oxygen. This modification distinguishes **1-2**  
219 from **1** and **1-1** in their interaction preference: **1-2** loses a hydrogen bond donor due to  
220 the nitrogen-to-oxygen substitution, while the electronegative oxygen introduces an unfa-  
221 vorable electrostatic repulsion to the carboxylate sidechain of the conserved  $\alpha$ C-helix glu-  
222 tamate (Fig. 4C, **1-2** insert).

223 Co-administering sorafenib with **1** and **1-1** led to synergistic improvement of  
224 *ptc>dRet<sup>M955T</sup>* fly viability (Fig. 4A). Individually, 200  $\mu$ M of sorafenib and 100  $\mu$ M of **1**

225 rescued 3% and 1% of *ptc>dRet*<sup>M955T</sup> flies to adulthood, respectively. Co-administering  
226 the two compounds rescued 6% of *ptc>dRet*<sup>M955T</sup> flies to adulthood ( $P < 0.05$ ). Similarly,  
227 co-administering sorafenib and 100  $\mu$ M of **1-1** rescued 8% of *ptc>dRet*<sup>M955T</sup> flies ( $P <$   
228 0.05). In contrast, co-administering 200  $\mu$ M of sorafenib and 200  $\mu$ M of **1-2** did not im-  
229 prove fly viability. As **1-2** only weakly rescued *ptc>dRet*<sup>M955T</sup> flies and showed no synergy  
230 with sorafenib, we did not pursue this hit any further.

231 We examined the kinase inhibition profile (DiscoverX) of **1** against a subset of the  
232 human protein kinome (Table 1). At 50  $\mu$ M, **1** did not appreciably inhibit SRC, BRAF, or  
233 S6K1, while it demonstrated weak activity against wild-type RET and moderate activity  
234 against the oncogenic isoform RET<sup>M918T</sup>. Of note, **1** inhibited other cancer-related targets  
235 such as FLT3 (Table 1), which activates the Ras/ERK signaling pathway [22].

236 **1** also showed activity against aspects of transformation and metastasis in the fly.  
237 In the mature larva, the *ptc* promoter is active in epithelial cells in a stripe pattern in the  
238 midline of the developing wing epithelium (Fig. 4C; wing disc). *ptc*-driven dRet activates  
239 multiple signaling pathways, promoting proliferation, epithelial-to-mesenchymal transition  
240 (EMT), and invasion of dRet<sup>M955T</sup>-expressing cells beyond the *ptc* domain [14] (Fig. 4C).  
241 Similar to sorafenib, oral administration of **1** blocked the invasion of dRet<sup>M955T</sup>-expressing  
242 cells into the surrounding wing epithelium (Fig. 4B).

243 At lower dosage (25  $\mu$ M), compound **2** weakly rescued *ptc>dRet*<sup>M955T</sup> flies (1%;  $P$   
244  $< 0.05$ ) (Fig. 5A). Unlike **1**, **2** did not act synergistically with sorafenib. This difference was  
245 confirmed by the kinase inhibition profile of **2** (Table 2), in which it has stronger inhibition  
246 of RET and RET<sup>M918T</sup>, but loses the inhibition of FLT3, two key differences between the  
247 kinase inhibition profiles of **1** and **2**.

248 Through a chemical similarity search of the ZINC database, we identified five com-  
249 pounds that share the 1*H*-indole-2-carboxamide moiety with docking poses similar to that  
250 of **2** (Fig. 5B, 5C; Table S2), and confirmed all five analogs were able to improve the  
251 viability of *ptc>dRet*<sup>M955T</sup> flies (Fig. 5A), albeit with weak efficacy (some have *P*-value  
252 above 0.05). At low dose (10 μM), **2-1** showed improved efficacy in rescuing  
253 *ptc>dRet*<sup>M955T</sup> flies relative to **2** and had similar efficacy as sorafenib at 200 μM. However,  
254 **2-1** showed poor solubility, limiting its usefulness as lead compound. **2-3** was also more  
255 efficacious than **2** and displayed better solubility in both DMSO and water than **2-1**; it also  
256 has the *N*-phenylacetamide moiety as a linker group, a common linker feature found in  
257 type-II KIs such as imatinib. Compound **2-3** displayed a different inhibition profile than **1**  
258 and **2** (Table 2): it strongly inhibits FLT3 and PDGFRB, though is weak against both RET  
259 and RET<sup>M918T</sup> and does not inhibit SRC.

260 ***Improving efficacy through compound hybridization.*** Interestingly, the chemical scaf-  
261 folds of our newly identified active compounds are not associated with inhibition of protein  
262 kinases, as the analysis with SEA search [23] — which relates ligand chemical similarity  
263 of ligands to protein pharmacology — suggests. However, they provide rescue of  
264 *ptc>dRet*<sup>M955T</sup> flies similar to that of sorafenib and regorafenib [15]. The docking poses of  
265 these compounds suggest a less-than-optimal interaction with the hinge region of protein  
266 kinases, a common feature of most KIs. Furthermore, the relatively low molecular weight  
267 (~350 g/mol) of these lead-like compounds provides a window for conducting lead opti-  
268 mization with medicinal chemistry. Hence, we sought to improve the efficacy of our com-  
269 putationally derived leads by installing a hinge-binding moiety found in known type-II KIs  
270 such as sorafenib.

271 We took into consideration the docking poses and phenotypic results of the known  
272 type-II kinase inhibitors (sorafenib and AD80 [1]) and lead compounds, as well as the  
273 synthetic accessibility and the novelty of the putative hybrid compounds, even if they do  
274 not dock optimally to our intended kinase targets. We focused on the functionalization of  
275 **2/2-3** based on these observations: 1) their 1*H*-indole moiety docks uniquely into the  
276 DFG-pocket and with the potential to interact with the  $\alpha$ C-helix glutamate (Fig. 5C), 2)  
277 their 1*H*-indole-2-carboxamide moiety resembles the urea linker that is commonly found  
278 in type-II KIs such as sorafenib (Fig. 6A; blue box), and 3) the *N*-phenylcarboxamide moi-  
279 ety of **2-3** is a common linker between the hinge-binding and the DFG-pocket moieties of  
280 type-II KIs, e.g. imatinib (Fig. 6A; grey box), while the *N*-(piperidin-4-yl)carboxamide moi-  
281 ety of **2** is not a common linker, and 4) docking pose of **2/3**'s 1*H*-indole moiety overlaps  
282 with the trifluoromethylphenyl moiety of sorafenib/AD80. We performed a fragment ex-  
283 change at the carboxamide position by combining the 1*H*-indole-2-carboxamide moiety  
284 of **2/2-3** with the hinge-binding moiety of sorafenib and of AD80, a multi-kinase inhibitor  
285 that has shown promise in MTC treatment [1], to create **3** and **4**, respectively (Fig. 6B).

286 Oral administration of **3** and **4** to *ptc>dRet<sup>M955T</sup>* flies demonstrated that the efficacy  
287 of **4** was low with only 3% rescue, while **3** demonstrated much improved efficacy with  
288 15% rescue (Fig. 6C;  $P < 0.05$ ), significantly higher rescue than the parent compound  
289 **2/2-3** and sorafenib. Additionally, **3** suppressed the invasion/migration of *dRet<sup>M955T</sup>*-ex-  
290 pressing cells in the wing epithelium (Fig. 6D), further confirming its efficacy against  
291 *dRet<sup>M955T</sup>*-induced oncogenicity. The kinase inhibition profile of **3** (Table 3) resembles  
292 that of the parent compound **2-3** (Table 2) with at least two notable exceptions: **3** inhibits

293 CSF1R, PDGFRB, and FLT3, all are receptor tyrosine kinases and orthologs of *Drosoph-*  
294 *ila* Pvr that activate the Ras/ERK signaling pathway [24] and play key roles in SRC acti-  
295 vation and tumor progression; and the inhibition of Aurora kinases AURKB and AURKC  
296 (*Drosophila* ortholog aurA or aurB). Of note, although **4** did not improve the viability of  
297 *ptc>dRet<sup>M955T</sup>* flies, it shares chemical similarity to several known type-I1/2 kinase inhibi-  
298 tors that have the common adenine moiety and a related indole moiety. This group of  
299 inhibitors was shown to inhibit other related kinases, increasing our confidence in the  
300 relevance of this chemical space for kinase pathway modulation [25].

## 301 DISCUSSION

302 ***Integrated discovery pipeline.*** This study demonstrates the utility of an integrated plat-  
303 form that combines *Drosophila* genetics, computational structural biology, and chemical  
304 synthesis to enrich for the discovery of useful chemical tools in an established *Drosophila*  
305 MTC model (Fig. 2). We have previously shown that *Drosophila* can provide a unique  
306 entry point for drug development, by capturing subtle structural changes in lead com-  
307 pounds that are often missed by cellular or biochemical assays. Here we refine this ap-  
308 proach by iteratively combining experimental testing with computational modeling. Over-  
309 all, a key strength of the combined approach is its ability to rapidly and in a cost-effective  
310 manner test chemically unique, purchasable compounds with our fly models; this platform  
311 allowed us to quickly confirm the *in situ* relevance of active chemotypes through iterations  
312 of computational modeling, synthetic chemistry, and phenotypic testing in the fly. We ex-  
313 pect this integrated pipeline is generally applicable to kinase networks associated with  
314 other diseases [7].

315 ***DFG-out modeling approach.*** DFGmodel is a recent computational development that  
316 generates models of kinases in their inactive, DFG-out conformation for rational design  
317 of type-II KIs [10]. In a recent study, models generated by DFGmodel were used to guide  
318 the optimization of the drug sorafenib, to target a new disease space [15]. Here, we  
319 demonstrated a successful application of DFGmodel to explore compounds that are not  
320 appreciated as kinase inhibitors. For each kinase target, DFGmodel uses multiple exper-  
321 imentally determined structures as modeling templates and generates multiple homology  
322 models. Thus, this method samples a large fraction of the DFG-out conformational space  
323 during the model construction, which enables us to account for the flexibility of the binding



324 site during virtual screening [26]. Notably, DFG-out models capture key features that are  
325 important for protein-ligand interactions in multiple kinases simultaneously, providing a  
326 framework for rationalizing activity of known inhibitors and developing unique KIs that  
327 target a signaling pathway. For example, our results suggest that the electrostatic poten-  
328 tial within the DFG-pocket is a key feature for inhibitor selectivity: ERK has an inverse  
329 electrostatic potential in the DFG-pocket than that of the target kinases such as RET and  
330 BRAF (Fig. 3), which may explain the insensitivity of ERK toward inhibitors such as so-  
331 rafenib.

332 **Identification of biologically active compounds.** Most clinically approved KIs are inef-  
333 fective against MTC; the most effective inhibitors, sorafenib and regorafenib, show limited  
334 efficacy in the *ptc>dRet<sup>M955T</sup>* fly model, rescuing 3-4% at 200  $\mu$ M [15]. Despite consider-  
335 able academic and industry effort, the known chemical space of kinase inhibitors is limited  
336 [7]. For example, sorafenib and regorafenib differ in only one non-hydrogen atom.  
337 Through structure-based virtual screening against multiple kinase targets in a disease  
338 pathway, we discovered chemically unique compounds (Table S2) with an ability to res-  
339 cue *ptc>dRet<sup>M955T</sup>* viability that is similar to the most effective FDA-approved drug soraf-  
340 enib (Figs. 4 and 5).

341 Importantly, our data indicates that these compounds act through key cancer net-  
342 works. For example, compounds **1**, **2**, **2-3** and **3** all have shown the ability to suppress  
343 invasion of *ptc>dRet<sup>M955T</sup>* cells in the wing epithelium. Previous works demonstrated that  
344 wing cell invasion is controlled by SRC [15, 27], which acts by controlling E-cadherin and  
345 Matrix Metalloproteases (MMPs). Of note, **1**, **2**, **2-3** and **3** each show significant activity  
346 against orthologs of *Drosophila* Pvr, a key regulator of Src: all show significant activity

347 against human FLT3, while **3** shows additional activity against Pvr orthologs CSF1R and  
348 PDGFRB. In addition to being orthologs of Pvr, FLT3, CSF1R, and PDGFRB similarly can  
349 activate SRC [28]. We propose that this activity against regulators of SRC account for the  
350 ability of **1**, **2**, **2-3** and **3** to suppress invasion, a key first step in tumor metastasis. Other  
351 activities, for example, **3**'s inhibition of Aurora kinases — required for proliferation during  
352 tumor progression [29] — likely also contributes. Indeed, AURK inhibitors are known to  
353 be active against MTC [30, 31] and synergy between AURKs and FLT3 is currently being  
354 explored clinically through a number of dual-AURKB/FLT3 inhibitors [32] [33].

355 ***Recombination of building blocks for future inhibitors.*** Though the new tool com-  
356 pounds **1** and **2** may not be sufficiently potent to serve as therapeutics, they reveal diverse  
357 fragment-like pharmacophores that serve as starting points for an exploration of new  
358 chemical space. These pharmacophores can be further optimized by combining with well-  
359 developed chemotypes that are known to interact with kinase binding sites (e.g., the hinge  
360 binding region) to form more efficacious chemical probes; this provides a key second step  
361 towards building effective compounds. For example, **2** and **2-3** include an 1*H*-indole moi-  
362 ety capable of occupying the DFG-pocket of protein kinases from different families and a  
363 carboxamide group commonly found in type-II KIs (Fig. 6A). Guided by the docking poses  
364 of these compounds, the 1*H*-indole-2-carboxamide group was combined with an opti-  
365 mized hinge-binding moiety from sorafenib, to form a significantly more efficacious com-  
366 pound (i.e., **3**). As indicated in the kinase inhibition profile of **3** (Table 3), it shares part of  
367 the target set of its constituents **2** and **2-3**.

368 In summary, we demonstrate the potential of combining chemical modeling with  
369 *Drosophila* genetics to rapidly and efficiently explore novel chemical space. This provides

370 an accessible and cost-effective platform that can be applied to a broad palette of dis-  
371 eases that can be modeled in *Drosophila*. Combining the strengths of these two high-  
372 throughput approaches opens the opportunity to develop novel tool and lead compounds  
373 that are effective in the context of the whole animal.

374

## 375 MATERIALS & METHODS

376 **DFG-out models.** Models of kinase targets (human RET, SRC, BRAF, S6K1) in the DFG-  
377 out conformation were generated using DFGmodel [10]. Briefly, the method takes a DFG-  
378 in structure or the sequence of the protein kinase as input. DFG-model relies on a man-  
379 ually curated alignment between the target kinase and multiple structures representing  
380 unique DFG-out conformations. It calls on the structure-based sequence alignment func-  
381 tion of T\_COFFEE/Expresso [34] v11.00.8 to perform sequence alignment of the kinase  
382 catalytic domain to the templates, followed by the multi-template function of MODELLER  
383 [35] v9.14 to generate 50 homology models covering a range of conformations. For each  
384 kinase 10 DFG-out models with largest binding site volume, as calculated by POVME [36]  
385 v2.0, were used for further study. These ensembles of models were evaluated and con-  
386 firmed to enrich known type-II inhibitors over non-ligands using docking, which provides  
387 an approximation of the binding site flexibility, as well as optimizes the binding site for  
388 protein-ligand complementarity and structure-based virtual screening [11, 26, 37]. The  
389 area-under-curve (AUC) of targets BRAF and RET DFG-out models are 90.6 vs. 82.8,  
390 respectively, which correspond to at least 5-fold increase in the enrichment accuracy over  
391 randomly selected ligands in a known sample set [37-39].

392 **Virtual screening.** Initial virtual screening utilized the ZINC12 [21] “available now” lead-  
393 like chemical library (downloaded in 2013, 2.2 million compounds). Default settings were  
394 used for the ligand conformer generation with OMEGA and the docking program FRED  
395 [40][41]. For each kinase, the ensemble of 10 DFG-out models was used for screening  
396 and the results were processed with the open-source cheminformatics toolkit RDKit  
397 (www.rdkit.org). To obtain a consensus docking result for RET and the targets BRAF,

398 SRC, p70-S6K, a two-step approach was used: 1) 2,000 ligands were collected for each  
399 kinase by identifying ligands that ranked in the top 10% for at least half of the DFG-out  
400 ensemble.; 2) ligands that scored in the top 25% in at least 3 of 4 kinase ensembles were  
401 collated into a final set of 247 compounds. These consensus ligands, representing  
402 0.0114% of the library, were visually inspected to remove molecules with energetically  
403 unfavorable or strained conformations, or with reactive functional groups that may inter-  
404 fere with assays [41], which are commonly observed in large virtual screenings. 8 com-  
405 pounds were selected based on their interactions with the receptor (DFG-pocket occu-  
406 pancy, hydrogen-bond to conserved amino acids, etc) and chemical novelty and were  
407 purchased for *Drosophila* viability screening. Analogs **1-1**, **1-2**, **2-1 to 2-5**, and others  
408 (Table S1) were identified based on the structure of compounds **1** and **2** through the  
409 chemical similarity search function available in ZINC15 [8] and SciFinder using the default  
410 setting and Tanimoto coefficient above 70%. These compounds are commercially avail-  
411 able through vendors such as ChemBridge and Enamine.

412 **Chemical Methods.** For synthetic procedures and characterization data related to com-  
413 pounds **1**, **3**, and **4**, please see supplementary materials.

414 **Kinase profiling of compounds.** Kinase inhibition profile of the compounds was as-  
415 sessed at 50  $\mu$ M through commercially available kinase profiling services (DiscoverX).

416 **Drosophila stocks.** Human orthologs of *Drosophila* genes were predicted by DIOPT  
417 ([http://www.flyrnai.org/cgi-bin/DRSC\\_orthologs.pl](http://www.flyrnai.org/cgi-bin/DRSC_orthologs.pl)). The multiple endocrine neoplasia  
418 (MEN) type 2B mutant form of *Drosophila* Ret carries the M955T mutation (dRet<sup>M955T</sup>),  
419 which corresponds to the M918T mutation found in human MTC patients. The *ptc-gal4*,

420 *UAS-GFP; UAS-dRet<sup>M955T</sup>/SM5(tub-gal80)-TM6B* transgenic flies were prepared accord-  
421 ing to standard protocols [15]. In these flies, the *tubulin* promoter drives GAL80, a sup-  
422 pressor of GAL4, to repress *dRet<sup>M955T</sup>* expression. We crossed them with *w* flies to obtain  
423 *ptc>dRet<sup>M955T</sup>* flies that lost *GAL80* allele, which derepressed *dRet<sup>M955T</sup>* expression (Fig.  
424 S1A). Transgenic *ptc>Ret<sup>M955T</sup>* flies were calibrated to have 0% survival when raised at  
425 25°C, which allowed for drug screening (Fig. S1B).

426 **Chemical genetic screening in flies.** We employed dominant modifier screening [15]  
427 using the *ptc-gal4, UAS-GFP; UAS-dRet<sup>M955T</sup>/SM5(tub-gal80)-TM6B* to screen for fly ki-  
428 nase genes that affected the *dRet<sup>M955T</sup>*-induced lethality in flies when heterozygous  
429 (*ptc>Ret<sup>M955T</sup>;kinase<sup>-/+</sup>*). Genes that improved or reduced survival of *ptc>dRet<sup>M955T</sup>* flies  
430 when heterozygous were designated as genetic ‘suppressors’ or ‘enhancers’, respec-  
431 tively (Fig. 1B). Suppressors are candidate therapeutic targets that when inhibited may  
432 reduce tumor progression.

433 Stock solutions of the test compounds were created by dissolving the compound in DMSO  
434 at the maximum concentration. The stock solutions were diluted by 1000-fold or more and  
435 mixed with semi-defined fly medium (Bloomington Drosophila Stock Center) to make  
436 drug-infused food (0.1% final DMSO concentration; maximum tolerable dose in flies). Ap-  
437 proximately 100 *ptc>dRet<sup>M955T</sup>* embryos alongside with wild-type (+;+/SM5<sub>tubgal80</sub>-TM6B)  
438 flies were raised until adulthood on drug-infused food for 13 days at 25°C. The numbers  
439 of empty pupal cases (*P* in Fig. S1B) and that of surviving adults (*A*) were used to deter-  
440 mine percentage of viability, while their body size, which is affected by food intake, tem-  
441 perature, and humidity, were compared to vehicle-treated groups to standardize the ex-  
442 perimental conditions.

443 **Wing discs cell migration/invasion assays.** Third-instar *ptc>dRet<sup>M955T</sup>* larvae were dis-  
444 sected, and developing wing discs were collected, fixed with 4% paraformaldehyde in  
445 PBS, and whole-mounted. At least 10 wing discs were analyzed for each treatment. In-  
446 vasive GFP-labeled *dRet<sup>M955T</sup>*-expressing cells were visualized by their green pseudo-  
447 color under a confocal microscope. The apical and the virtual z-series views of the wing  
448 disc were examined to identify abnormal tissue growth and *dRet<sup>M955T</sup>*-expressing cells  
449 migrating beyond the *ptc* domain boundary.

450

451

## 452 **ACKNOWLEDGMENTS**

453 We thank Peter Smibert (New York Genome Center) for *ptc>dRet*<sup>M955T</sup> flies, Kevin  
454 Cook (Bloomington *Drosophila* Stock Center) for kinome mutant fly lines. This work was  
455 supported by the National Institutes of Health (R01-GM108911) to A.S. and P.M.U.U. A.S.  
456 was also supported by Department of Defense grant W81XWH-15-1-0539. M.S. and R.C.  
457 were supported by National Institutes of Health grants U54OD020353, R01-CA170495,  
458 and R01-CA109730 and Department of Defense grant W81XWH-15-1-0111. The Dar la-  
459 boratory (A.P.S. and A.C.D.) is supported by Innovation awards from the NIH (DP2  
460 CA186570-01) and Damon Runyon-Rachleff Foundation. A.C.D. is a Pew-Stewart  
461 Scholar in Cancer Research and Young Investigator of the Pershing-Square Sohn Can-  
462 cer Research Alliance. We appreciate OpenEye Scientific Software, Inc. for granting us  
463 access to its high-performance molecular modeling applications through its academic li-  
464 cense program. This work was supported in part through the computational resources  
465 and staff expertise provided by the Department of Scientific Computing at the Icahn  
466 School of Medicine at Mount Sinai.

467

## 468 **AUTHOR CONTRIBUTIONS**

469 P.M.U.U. performed and analyzed the homology modeling of kinases, virtual screening  
470 of compound library, selection and design of testing compounds. M.S. managed *Drosoph-*  
471 *ila* stocks and testing compounds in whole animal and *in vivo* experiments. A.P.S. con-  
472 ducted organic synthesis, design, and validation of test compounds. P.M.U.U. analyzed  
473 results and wrote the manuscript with input from all co-authors. R.L.C., A.C.D., and A.S.  
474 initiated, supervised, and acquired funding and resources for the project.



475

476 **COMPETING FINANCIAL INTERESTS**

477 The authors have declared that no competing interests exist.

478 **REFERENCES**

- 479 1. Dar AC, Das TK, Shokat KM, Cagan RL. Chemical genetic discovery of targets  
480 and anti-targets for cancer polypharmacology. *Nature*. 2012;486(7401):80-4. doi:  
481 10.1038/nature11127.
- 482 2. Kasai Y, Cagan R. *Drosophila* as a tool for personalized medicine: a primer.  
483 *Personalized medicine*. 2010;7(6):621-32. doi: 10.2217/pme.10.65.
- 484 3. Sonoshita M, Cagan RL. Modeling Human Cancers in *Drosophila*. *Curr Top Dev*  
485 *Biol*. 2017;121:287-309. doi: 10.1016/bs.ctdb.2016.07.008.
- 486 4. Vidal M, Wells S, Ryan A, Cagan R. ZD6474 suppresses oncogenic RET isoforms  
487 in a *Drosophila* model for type 2 multiple endocrine neoplasia syndromes and papillary  
488 thyroid carcinoma. *Cancer research*. 2005;65(9):3538-41. doi: 10.1158/0008-5472.CAN-  
489 04-4561.
- 490 5. Manning G, Whyte DB, Martinez R, Hunter T, Sudarsanam S. The protein kinase  
491 complement of the human genome. *Science*. 2002;298(5600):1912-34. doi:  
492 10.1126/science.1075762.
- 493 6. Read RD, Goodfellow PJ, Mardis ER, Novak N, Armstrong JR, Cagan RL. A  
494 *Drosophila* model of multiple endocrine neoplasia type 2. *Genetics*. 2005;171(3):1057-  
495 81. doi: 10.1534/genetics.104.038018.
- 496 7. Schlessinger A, Abagyan R, Carlson HA, Dang KK, Guinney J, Cagan RL. Multi-  
497 targeting Drug Community Challenge. *Cell Chem Biol*. 2017;24(12):1434-5. doi:  
498 10.1016/j.chembiol.2017.12.006.
- 499 8. Sterling T, Irwin JJ. ZINC 15--Ligand Discovery for Everyone. *Journal of chemical*  
500 *information and modeling*. 2015;55(11):2324-37. doi: 10.1021/acs.jcim.5b00559.
- 501 9. Irwin JJ, Shoichet BK. Docking Screens for Novel Ligands Conferring New Biology.  
502 *Journal of medicinal chemistry*. 2016;59(9):4103-20. doi:  
503 10.1021/acs.jmedchem.5b02008.
- 504 10. Ung PMU, Schlessinger A. DFGmodel: predicting protein kinase structures in  
505 inactive states for structure-based discovery of type-II inhibitors. *ACS chemical biology*.  
506 2015;10(1):269-78. doi: 10.1021/cb500696t.
- 507 11. Kufareva I, Abagyan R. Type-II kinase inhibitor docking, screening, and profiling  
508 using modified structures of active kinase states. *Journal of medicinal chemistry*.  
509 2008;51(24):7921-32. doi: 10.1021/jm8010299.
- 510 12. Cerrato A, De Falco V, Santoro M. Molecular genetics of medullary thyroid  
511 carcinoma: the quest for novel therapeutic targets. *Journal of molecular endocrinology*.  
512 2009;43(4):143-55. doi: 10.1677/JME-09-0024.
- 513 13. Hadoux J, Pacini F, Tuttle RM, Schlumberger M. Management of advanced  
514 medullary thyroid cancer. *The lancet Diabetes & endocrinology*. 2016;4(1):64-71. doi:  
515 10.1016/S2213-8587(15)00337-X.

- 516 14. Vidal M, Larson DE, Cagan RL. Csk-deficient boundary cells are eliminated from  
517 normal *Drosophila* epithelia by exclusion, migration, and apoptosis. *Developmental cell*.  
518 2006;10(1):33-44. doi: 10.1016/j.devcel.2005.11.007.
- 519 15. Sonoshita M, Scopton AP, Ung PMU, Murray MA, Silber L, Maldonado AY, et al.  
520 A whole-animal platform to advance a clinical kinase inhibitor into new disease space.  
521 *Nature chemical biology*. 2018;14(3):291-8. doi: 10.1038/nchembio.2556.
- 522 16. Wan PT, Garnett MJ, Roe SM, Lee S, Niculescu-Duvaz D, Good VM, et al.  
523 Mechanism of activation of the RAF-ERK signaling pathway by oncogenic mutations of  
524 B-RAF. *Cell*. 2004;116(6):855-67. doi: 10.1016/S0092-8674(04)00215-6.
- 525 17. Seeliger MA, Nagar B, Frank F, Cao X, Henderson MN, Kuriyan J. c-Src binds to  
526 the cancer drug imatinib with an inactive Abl/c-Kit conformation and a distributed  
527 thermodynamic penalty. *Structure*. 2007;15(3):299-311. doi: 10.1016/j.str.2007.01.015.
- 528 18. Huse M, Kuriyan J. The conformational plasticity of protein kinases. *Cell*.  
529 2002;109(3):275-82. doi: 10.1016/S0092-8674(02)00741-9.
- 530 19. Zhao Z, Wu H, Wang L, Liu Y, Knapp S, Liu Q, et al. Exploration of type II binding  
531 mode: A privileged approach for kinase inhibitor focused drug discovery? *ACS chemical*  
532 *biology*. 2014;9(6):1230-41. doi: 10.1021/cb500129t.
- 533 20. Mulligan LM. RET revisited: expanding the oncogenic portfolio. *Nature reviews*  
534 *Cancer*. 2014;14(3):173-86. doi: 10.1038/nrc3680.
- 535 21. Irwin JJ, Sterling T, Mysinger MM, Bolstad ES, Coleman RG. ZINC: a free tool to  
536 discover chemistry for biology. *Journal of chemical information and modeling*.  
537 2012;52(7):1757-68. doi: 10.1021/ci3001277.
- 538 22. Scholl C, Gilliland DG, Frohling S. Deregulation of signaling pathways in acute  
539 myeloid leukemia. *Semin Oncol*. 2008;35(4):336-45. doi:  
540 10.1053/j.seminoncol.2008.04.004.
- 541 23. Keiser MJ, Roth BL, Armbruster BN, Ernsberger P, Irwin JJ, Shoichet BK. Relating  
542 protein pharmacology by ligand chemistry. *Nat Biotechnol*. 2007;25(2):197-206. doi:  
543 10.1038/nbt1284.
- 544 24. Schlessinger J. Cell signaling by receptor tyrosine kinases. *Cell*. 2000;103(2):211-  
545 25. doi: 10.1016/S0092-8674(00)00114-8.
- 546 25. Burchat A, Borhani DW, Calderwood DJ, Hirst GC, Li B, Stachlewitz RF. Discovery  
547 of A-770041, a src-family selective orally active lck inhibitor that prevents organ allograft  
548 rejection. *Bioorganic & medicinal chemistry letters*. 2006;16(1):118-22. doi:  
549 10.1016/j.bmcl.2005.09.039.
- 550 26. Amaro RE, Li WW. Emerging methods for ensemble-based virtual screening. *Curr*  
551 *Top Med Chem*. 2010;10(1):3-13. doi: 10.2174/156802610790232279.
- 552 27. Vidal M, Warner S, Read R, Cagan RL. Differing Src signaling levels have distinct  
553 outcomes in *Drosophila*. *Cancer research*. 2007;67(21):10278-85. doi: 10.1158/0008-  
554 5472.CAN-07-1376.

- 555 28. Sachsenmaier C, Sadowski HB, Cooper JA. STAT activation by the PDGF  
556 receptor requires juxtamembrane phosphorylation sites but not Src tyrosine kinase  
557 activation. *Oncogene*. 1999;18(24):3583-92. doi: 10.1038/sj.onc.1202694.
- 558 29. Sasai K, Katayama H, Stenoien DL, Fujii S, Honda R, Kimura M, et al. Aurora-C  
559 kinase is a novel chromosomal passenger protein that can complement Aurora-B kinase  
560 function in mitotic cells. *Cell Motil Cytoskeleton*. 2004;59(4):249-63. doi:  
561 10.1002/cm.20039.
- 562 30. Baldini E, Arlot-Bonnemains Y, Sorrenti S, Mian C, Pelizzo MR, De Antoni E, et al.  
563 Aurora kinases are expressed in medullary thyroid carcinoma (MTC) and their inhibition  
564 suppresses in vitro growth and tumorigenicity of the MTC derived cell line TT. *BMC*  
565 *Cancer*. 2011;11:411. doi: 10.1186/1471-2407-11-411.
- 566 31. Tuccilli C, Baldini E, Prinzi N, Morrone S, Sorrenti S, Filippini A, et al. Preclinical  
567 testing of selective Aurora kinase inhibitors on a medullary thyroid carcinoma-derived cell  
568 line. *Endocrine*. 2016;52(2):287-95. doi: 10.1007/s12020-015-0700-0.
- 569 32. Bavetsias V, Linardopoulos S. Aurora Kinase Inhibitors: Current Status and  
570 Outlook. *Front Oncol*. 2015;5:278. doi: 10.3389/fonc.2015.00278.
- 571 33. Grundy M, Seedhouse C, Shang S, Richardson J, Russell N, Pallis M. The FLT3  
572 internal tandem duplication mutation is a secondary target of the aurora B kinase inhibitor  
573 AZD1152-HQPA in acute myelogenous leukemia cells. *Mol Cancer Ther*. 2010;9(3):661-  
574 72. doi: 10.1158/1535-7163.MCT-09-1144.
- 575 34. Notredame C, Higgins DG, Heringa J. T-Coffee: A novel method for fast and  
576 accurate multiple sequence alignment. *Journal of molecular biology*. 2000;302(1):205-17.  
577 doi: 10.1006/jmbi.2000.4042.
- 578 35. Sali A, Blundell TL. Comparative protein modelling by satisfaction of spatial  
579 restraints. *Journal of molecular biology*. 1993;234(3):779-815. doi:  
580 10.1006/jmbi.1993.1626.
- 581 36. Durrant JD, Votapka L, Sorensen J, Amaro RE. POVME 2.0: An Enhanced Tool  
582 for Determining Pocket Shape and Volume Characteristics. *Journal of chemical theory*  
583 *and computation*. 2014;10(11):5047-56. doi: 10.1021/ct500381c.
- 584 37. Fan H, Irwin JJ, Webb BM, Klebe G, Shoichet BK, Sali A. Molecular docking  
585 screens using comparative models of proteins. *Journal of chemical information and*  
586 *modeling*. 2009;49(11):2512-27. doi: 10.1021/ci9003706.
- 587 38. Katritch V, Rueda M, Lam PC, Yeager M, Abagyan R. GPCR 3D homology models  
588 for ligand screening: lessons learned from blind predictions of adenosine A2a receptor  
589 complex. *Proteins*. 2010;78(1):197-211. doi: 10.1002/prot.22507.
- 590 39. Carlsson J, Coleman RG, Setola V, Irwin JJ, Fan H, Schlessinger A, et al. Ligand  
591 discovery from a dopamine D3 receptor homology model and crystal structure. *Nature*  
592 *chemical biology*. 2011;7(11):769-78. doi: 10.1038/nchembio.662.
- 593 40. OEDOCKING 3.2.0.2: OpenEye Scientific Software, Santa Fe, ME.

594 41. Baell JB, Holloway GA. New substructure filters for removal of pan assay  
595 interference compounds (PAINS) from screening libraries and for their exclusion in  
596 bioassays. *Journal of medicinal chemistry*. 2010;53(7):2719-40. doi: 10.1021/jm901137j.

597

598

599

## FIGURE LEGENDS

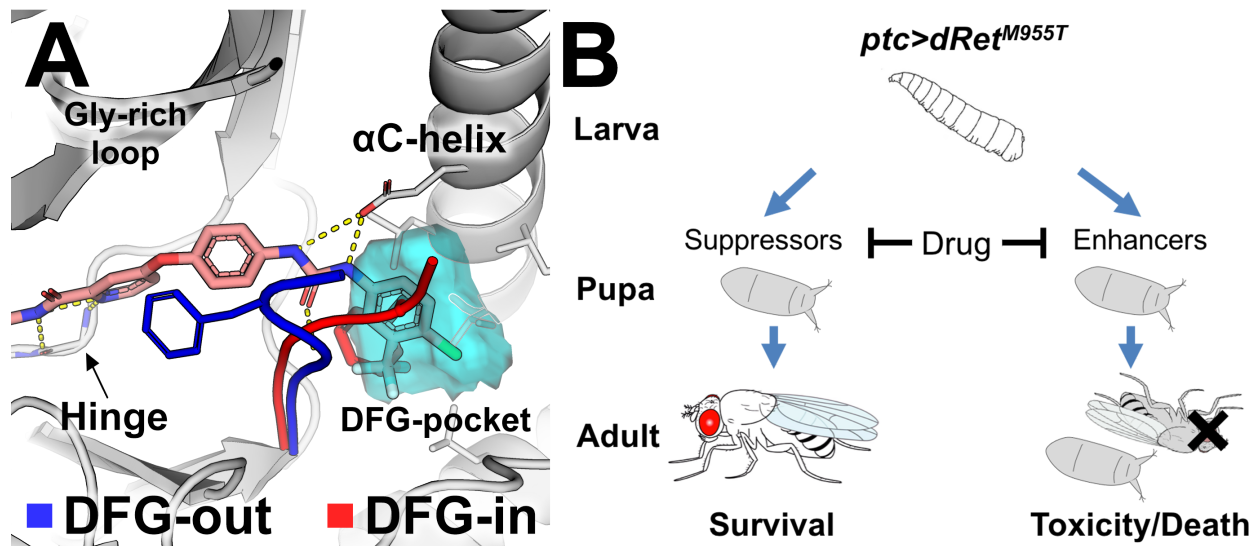

600

601 **Figure 1. Kinase binding to type-II kinase inhibitors. (A)** The conformational state of  
602 protein kinases (e.g., KDR) including DFG-in (red) and DFG-out (blue) is determined by  
603 the DFG-motif. The DFG-pocket (cyan mesh) is unique to the DFG-out conformation.  
604 Sorafenib is shown in pink. Broken yellow lines indicate hydrogen bonds. **(B)** A scheme  
605 depicting the positive and negative effects of drug acting on genetic modifiers of medullary  
606 thyroid cancer in a *Drosophila* model. *ptc*-driven *dRet<sup>M955T</sup>* induces lethality during devel-  
607 opment. ‘Suppressors’ or ‘enhancers’ suppress or enhance, respectively, *dRet<sup>M955T</sup>*-in-  
608 duced disease phenotypes as revealed in genetic screening. A drug can suppress lethal-  
609 ity by inhibiting the suppressors. It can also induce toxicity and/or worsen transformed  
610 phenotypes by inhibiting the enhancers, which results in enhanced lethality.

611

612

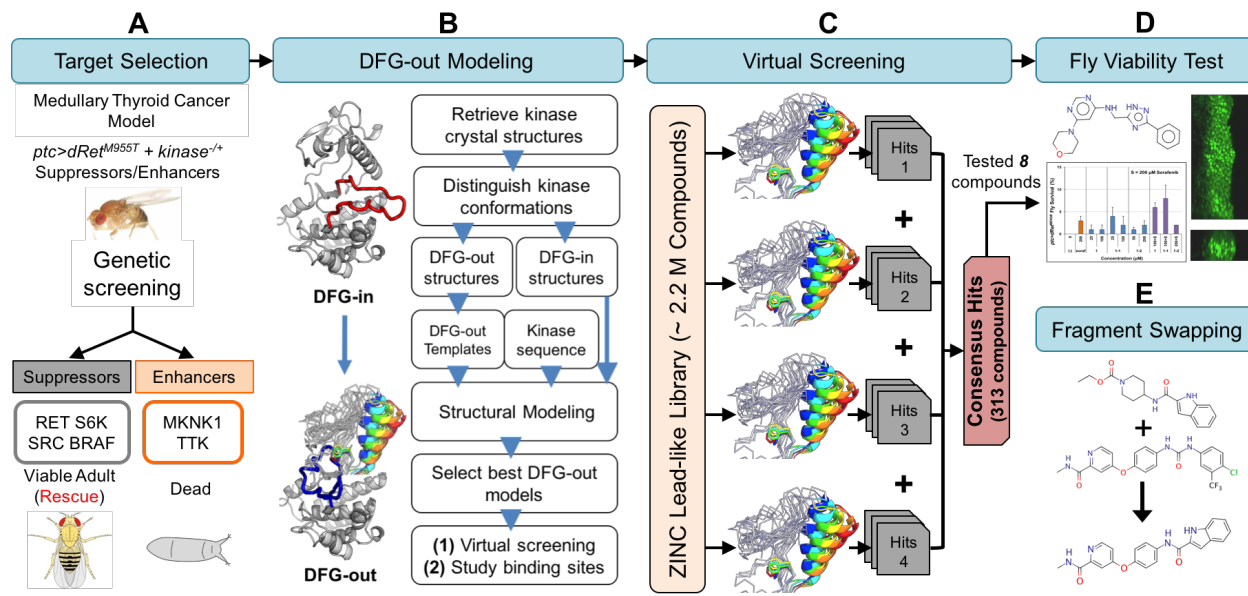

613  
 614 **Figure 2. Fly genetics and computational chemistry discovery platform.** Key steps  
 615 include **(A)** determining suppressors and enhancers in a dominant modifier genetic  
 616 screening and their *in silico* modelability, **(B)** generating DFG-out kinase models using  
 617 DFGmodel, **(C)** virtual screenings of compound libraries against the modeled suppressors  
 618 and enhancers, combining top-ranking screening results into consensus result, **(D)** test-  
 619 ing top-ranking compounds for rescue of lethality (left panel) and migration of transformed  
 620 cells in developing wing discs of *ptc>dRet<sup>M955T</sup>* flies (right panel), and **(E)** refining hits by  
 621 combining structural elements of computationally derived hits and that of drugs and eval-  
 622 uating new targets.

623  
 624

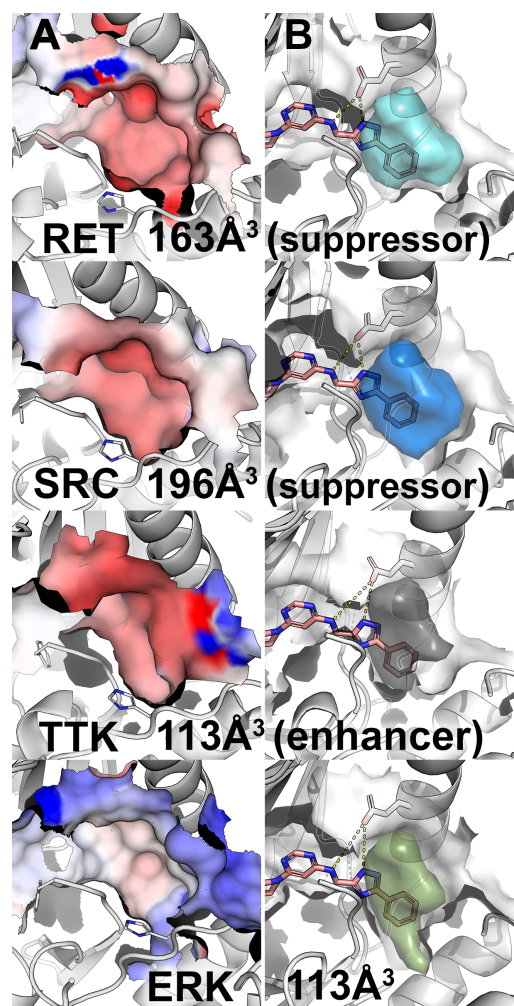

625

626 **Figure 3. Visualization of DFG-pockets. (A)** Electrostatic potential (red, negative po-  
627 tential; blue, positive potential) on the surface of the DFG-pocket in various kinases, in-  
628 cluding the suppressors RET and SRC, the enhancer TTK, and ERK. **(B)** Accessible vol-  
629 ume of the DFG-pocket (colored volume) for potential type-II kinase inhibitor. Hit molecule  
630 **1** is depicted in pink sticks. Broken yellow lines indicate hydrogen bonds.

631

632



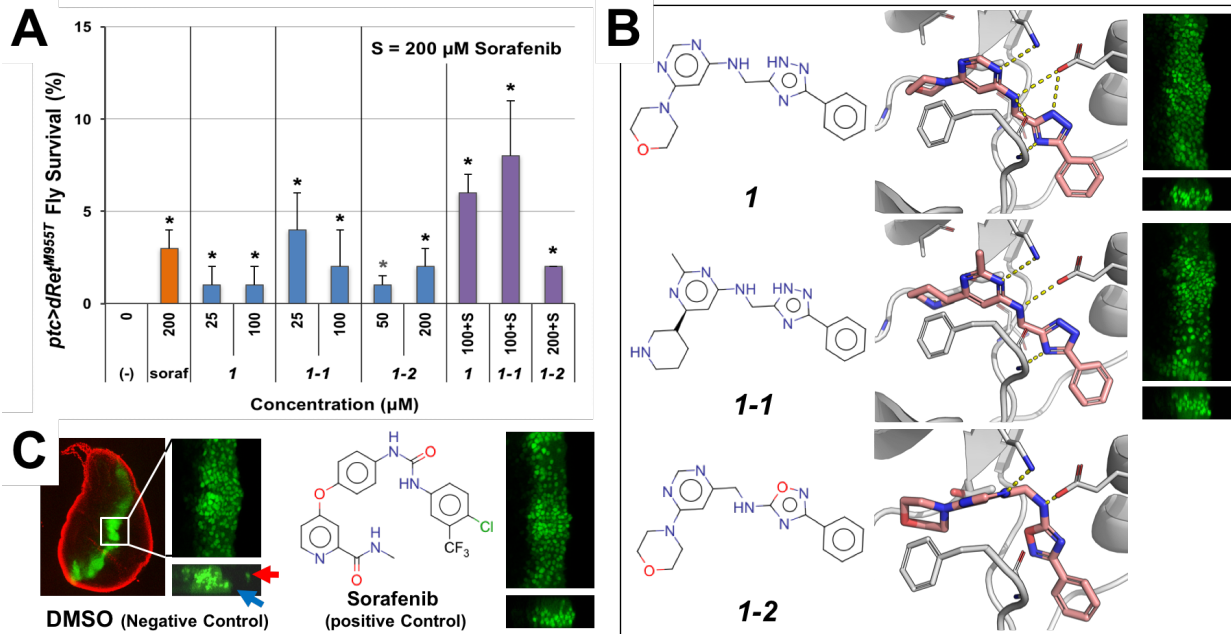

633  
 634 **Figure 4. Compound 1 and its analogs.** (A) Rescue of *ptc>dRet*<sup>M955T</sup> fly lethality by **1**  
 635 and **1-1**. Both showed improved efficacy (synergy) when co-administrated with 200 μM  
 636 sorafenib (soraf). (-), vehicle DMSO control. Error bars represent standard error in tripli-  
 637 cate experiments. \**P* < 0.05 in one-sided Student's *t*-test as compared with vehicle con-  
 638 trol. (B) Docking pose of **1** and its analogs **1-1** and **1-2** (salmon sticks) with a DFG-out  
 639 model of RET (broken yellow lines indicate hydrogen bonds), and their inhibition of mi-  
 640 gration of the dRet<sup>M955T</sup>-expressing cells. Right, suppression of cell migration by **1** and **1-**  
 641 **1**. Controls are shown in (C). (C) *In vivo* cell migration assay in *ptc>dRet*<sup>M955T</sup> flies. Left,  
 642 a developing whole wing disc containing GFP-labeled, dRet<sup>M955T</sup>-expressing cells consti-  
 643 tuting a stripe in the midline. The disc margin is visualized with DAPI (red pseudocolor).  
 644 There are wild-type cells in black areas. Center, overgrowth of dRet<sup>M955T</sup>-expressing cells  
 645 resulting in the thickening of the stripe in the apical view (top). In the z-series view (bot-  
 646 tom), dRet<sup>M955T</sup>-expressing cells are migrating away from the original domain (arrows).  
 647 Right, sorafenib suppressed the migration.

648

649

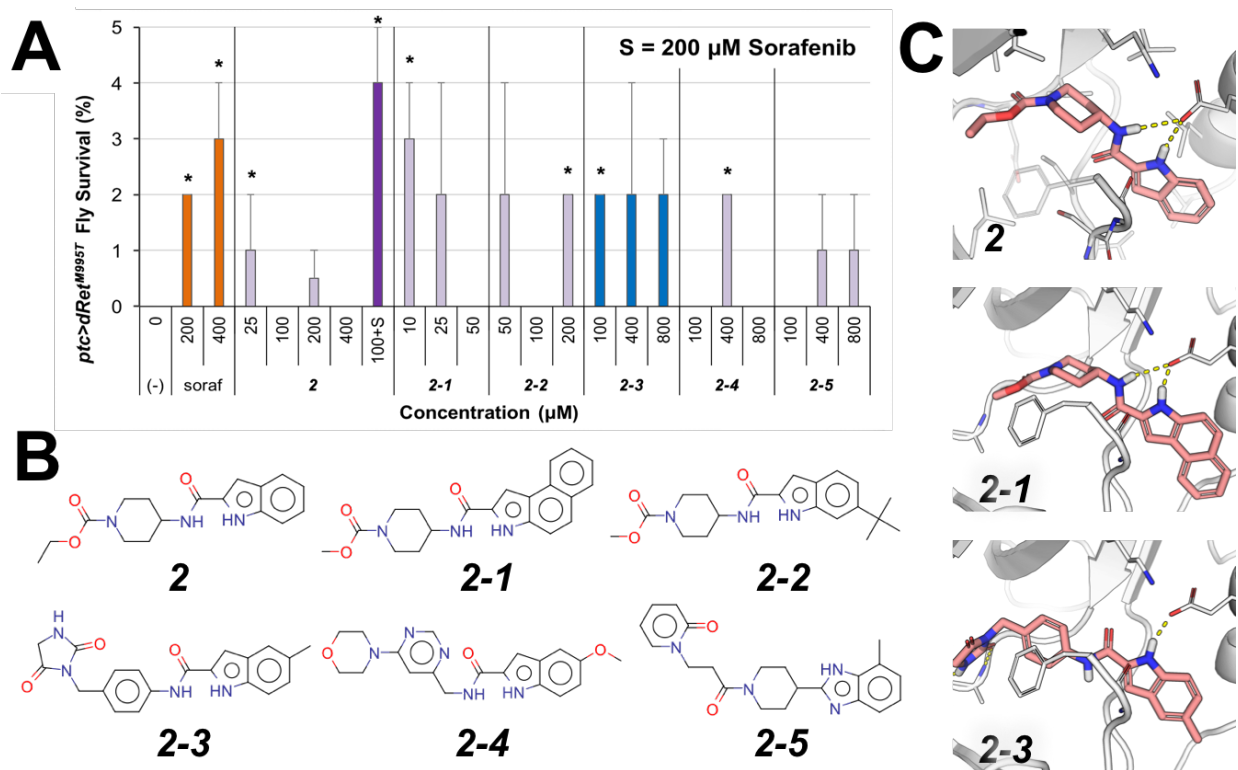

650  
 651 **Figure 5. Rescue of *ptc>dRet<sup>M955T</sup>* flies by **2** and its analogs. (A) *ptc>dRet<sup>M955T</sup>* viabil-**  
 652 **ity assay. **2** showed increased efficacy when co-administrated with 200 μM sorafenib. (-**  
 653 **), vehicle control. Error bars represent standard error in triplicate experiments. \**P* < 0.05**  
 654 **in one-sided Student's *t*-test as compared with no-drug control. (B) Chemical structure of**  
 655 ****2** and its analogs. (C) Docking pose of **2** and its analogs in a RET DFG-out model. These**  
 656 **compounds are proposed to be putative type-II kinase inhibitors that bind in the DFG-**  
 657 **pocket through their 1*H*-indole moiety and interact with the conserved αC-helix glutamate**  
 658 **side chain and DFG-Aspartate backbone (broken yellow lines).**

659

660

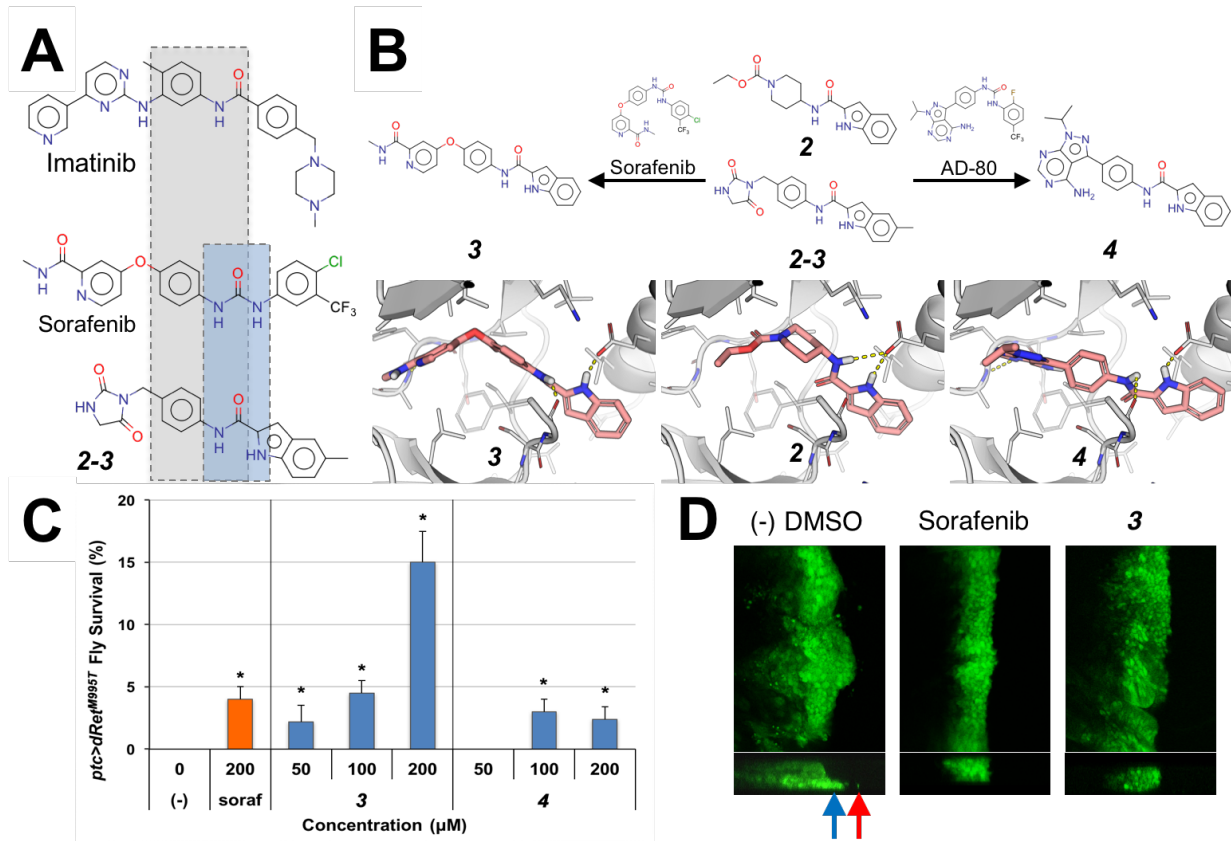

661

662 **Figure 6. Hybrid compounds with improved efficacy. (A)** The kinase inhibitors  
 663 imatinib, sorafenib, and **2-3** share the common *N*-phenylcarboxamide moiety (grey box),  
 664 while the *1H*-indole-2-carboxamide of **2-3** resembles the urea linker of sorafenib (blue  
 665 box). **(B)** Hybridization of **2** and sorafenib and AD-80 yielded **3** and **4**, respectively. Top,  
 666 chemical structures of compounds. Bottom, docking poses of compounds in a RET DFG-  
 667 out model. **(C)** **3** rescued *ptc>dRet<sup>M955T</sup>* flies more effectively than by either **2** or sorafenib  
 668 alone. (-), vehicle control. Error bars represent standard error in triplicate experiments. \**P*  
 669 < 0.05 in one-sided Student's *t*-test as compared with no-drug control. **(D)** **3** suppresses  
 670 migration of *dRet<sup>M955T</sup>*-expressing wing disc cells from the original domain (green) simi-  
 671 larly to the positive control, sorafenib. Top and bottom, apical and z-series views, respec-  
 672 tively. Arrows, migrating cells.

673

674

675 **SUPPORTING INFORMATION LEGENDS**

676  
677 **Figure S1. (A)** Preparation of transgenic *ptc>dRet<sup>M955T</sup>* flies for chemical genetic screen-  
678 ing [3]. **(B)** Determination of compound efficacy in a fly-based chemical genetic screening.  
679 The numbers of empty pupal cases (*P*) and surviving adult (*A*) are used to determine  
680 viability.

681  
682  
683  
684 **Figure S2. DFG-pocket of various protein kinases.** The left panels show the DFG-  
685 pocket (colored volume) with the docking pose of **1**. The right panels show the electro-  
686 static potential on the surface of DFG-pocket (blue, positive; red, negative).

687  
688  
689  
690 **Figure S3. Common interactions in type-II inhibitor binding site.** Type-II kinase in-  
691 hibitors are modular. They are composed of a hinge-binding moiety and a spacer group,  
692 followed by a linker that forms hydrogen bonds with the conserved glutamate residue on  
693 the  $\alpha$ C-helix, as well as a hydrophobic “cap” group that docks into the DFG-pocket. Key  
694 elements in type-II inhibitor/kinase interactions include **(A)** Hydrogen bonds with “hinge”  
695 amide backbone. **(B)**  $\pi$ - $\pi$  stacking with DFG-Phe. **(C)** Hydrogen bonds with  $\alpha$ C-helix glu-  
696 tamate. **(D)** Hydrogen bond with DFG-Asp amide backbone. **(E)** van der Waals interac-  
697 tions in DFG-pocket.

698 **TABLES**

699

**Table 1.** Kinase inhibition profile of compound **1** at 50  $\mu$ M.

| Kinase      | % Inhib.  | Kinase      | % Inhib. |
|-------------|-----------|-------------|----------|
| ABL1        | 0         | mTOR        | 4        |
| AURKA       | 22        | PDGFRB      | 21       |
| AURKB       | 7         | RET         | 15       |
| AURKC       | 2         | RET (M918T) | 28       |
| BRAF        | 9         | RET (V804L) | 35       |
| CSF1R       | 3         | S6K1        | 0        |
| FGFR        | 0         | SRC         | 5        |
| <b>FLT3</b> | <b>52</b> | TTK         | 17       |

700 Bold, inhibited by more than 40%.

701

**Table 2.** Kinase inhibition profile of compounds **2** and **2-3** at 50  $\mu$ M.

| Compound <b>2</b> |          |                    |           | Compound <b>2-3</b> |           |                    |           |
|-------------------|----------|--------------------|-----------|---------------------|-----------|--------------------|-----------|
| Kinase            | % Inhib. | Kinase             | % Inhib.  | Kinase              | % Inhib.  | Kinase             | % Inhib.  |
| ABL1              | 0        | mTOR               | 5         | ABL1                | 2         | mTOR               | 8         |
| AURKA             | 10       | PDGFRB             | 20        | AURKA               | 13        | PDGFRB             | <b>91</b> |
| AURKB             | 2        | RET                | 34        | AURKB               | 22        | RET                | 24        |
| AURKC             | 22       | <b>RET (M918T)</b> | <b>44</b> | AURKC               | 2         | RET (M918T)        | 23        |
| BRAF              | 0        | <b>RET (V804L)</b> | <b>44</b> | BRAF                | 0         | <b>RET (V804L)</b> | <b>43</b> |
| CSF1R             | 12       | S6K1               | 0         | CSF1R               | 20        | S6K1               | 0         |
| FGFR              | 0        | SRC                | 6         | FGFR                | 4         | SRC                | 0         |
| FLT3              | 25       | TTK                | 31        | <b>FLT3</b>         | <b>78</b> | TTK                | 26        |

702 Bold, inhibited by more than 40%.

703

704

**Table 3.** Kinase inhibition profile of compound **3** at 50  $\mu$ M.

| Kinase       | % Inhib.  | Kinase             | % Inhib.  |
|--------------|-----------|--------------------|-----------|
| ABL1         | 0         | mTOR               | 4         |
| AURKA        | 15        | <b>PDGFRB</b>      | <b>98</b> |
| <b>AURKB</b> | <b>88</b> | RET                | 29        |
| <b>AURKC</b> | <b>91</b> | RET (M918T)        | 26        |
| BRAF         | 4         | <b>RET (V804L)</b> | <b>46</b> |
| <b>CSF1R</b> | <b>95</b> | S6K1               | 0         |
| FGFR         | 0         | SRC                | 4         |
| <b>FLT3</b>  | <b>80</b> | TTK                | 27        |

705 Bold, inhibited by more than 40%.

706
